# Supplementary material for: Oleanolic Acid Acetate Alleviates Cisplatin-Induced Nephrotoxicity Via Inhibition of the Caspase and RIPK Pathways
Source: Preprints.org preprint supplement (doi:10.20944/preprints202403.0903.v1), 2024-03-15
Supplement: Supplementary file 1 [file supplementary]

**Supplementary Materials**

**Oleanolic Acid Acetate Alleviates Cisplatin-Induced Nephrotoxicity Via Inhibition of the Caspase and RIPK Pathways**

Bori Lee1†, Yeon-Yong Kim1†, Seungwon Jeong1, Seung Woong Lee1, Seung-Jae Lee1, Mun-Chual Rho1, Sang-Hyun Kim2*, Soyoung Lee1*

*1Functional Biomaterials Research Center, Korea Research Institute of Bioscience and Biotechnology (KRIBB), Jeongeup, Jeonbuk, Republic of Korea*

*2CMRI, Department of Pharmacology, School of Medicine, Kyungpook National University, Daegu, Republic of Korea*

**∗ Corresponding author**

Dr. Soyoung Lee (sylee@kribb.re.kr) and Prof. Sang-Hyun Kim (shkim72@knu.ac.kr), **Telephone:** +82-63-570-5236 (S.L.) and +82-53-420-4838 (S.-H.K.)

**† These authors have contributed equally to this work.**


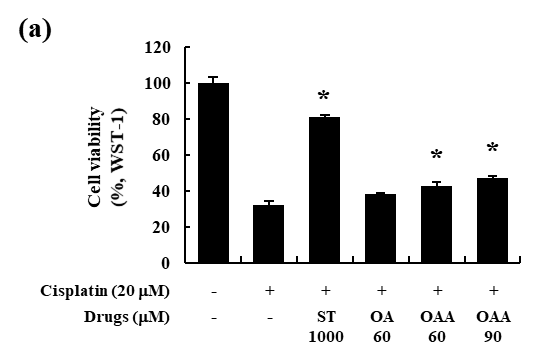


**Figure S1**. Effect of OAA on cell death in cisplatin-exposed TCMK-1 cells. Viability of TCMK-1 cells was analyzed using WST analysis after pretreatment with various concentrations of OAA or OA, followed by stimulation with cisplatin for 21 h (**a**). All data are presented as mean ± SD. *p < 0.05.
